# Supplementary material for: Identification of CDKL3 as a critical regulator in development of glioma through regulating RRM2 and the JNK signaling pathway
Source: PubMed Central journal article supplement — Cancer Sci. 2021 Jun 28;112(8):3150–62. doi: 10.1111/cas.15010 (PMC8353949; doi:10.1111/cas.15010), 2021-06-28
Supplement: CAS-112-3150-s002.pdf [file CAS-112-3150-s002.pdf]

**Table S1. The targeting sequences and shRNA sequences used in construction**

| Gene    | Target sequence       | No.        | shRNA sequence                                               |
|---------|-----------------------|------------|--------------------------------------------------------------|
| ALDH9A1 | TTGGTTATACCAGAAGAGAAC | Pbr-17162a | ccggTTGGTTATACCAGAAGAGAACctcgagGTTCTCTTCTGGTATAACCAAttttg    |
| ALDH9A1 |                       | Pbr-17162b | aattcaaaaaTTGGTTATACCAGAAGAGAACctcgagGTTCTCTTCTGGTATAACCAA   |
| ALDH9A1 | TCCCAAATTAAGGATGGATA  | Pbr-17163a | ccggTCCCAAATTAAGGATGGATActcgagTATCCATCCTTTAATTTGGGAttttg     |
| ALDH9A1 |                       | Pbr-17163b | aattcaaaaaTCCCAAATTAAGGATGGATActcgagTATCCATCCTTTAATTTGGGA    |
| ALDH9A1 | ACCTTGGAACCTTGAGGCAAA | Pbr-17164a | ccggACCTTGGAACCTTGAGGCAAActcgagTTTGCCTCCAAGTTCCAAGGTttttg    |
| ALDH9A1 |                       | Pbr-17164b | aattcaaaaaACCTTGGAACCTTGAGGCAAActcgagTTTGCCTCCAAGTTCCAAGGT   |
| CDKL3   | GAGGAGATATCTCAGAACCAA | Pbr-10064a | ccggGAGGAGATATCTCAGAACCAAactcgagTTGGTTCTGAGATATCTCCTCttttg   |
| CDKL3   |                       | Pbr-10064b | aattcaaaaaGAGGAGATATCTCAGAACCAAactcgagTTGGTTCTGAGATATCTCCTC  |
| CDKL3   | ACTAACTGTAATGGCTTGAAA | Pbr-00158a | ccggACTAACTGTAATGGCTTGAAAactcgagTTTCAAGCCATTACAGTTAGTttttg   |
| CDKL3   |                       | Pbr-00158b | aattcaaaaaACTAACTGTAATGGCTTGAAAactcgagTTTCAAGCCATTACAGTTAGT  |
| CDKL3   | CACACAGTATTAGATGAGTTA | Pbr-00159a | ccggCACACAGTATTAGATGAGTTActcgagTAACTCATCTAATACTGTGTGttttg    |
| CDKL3   |                       | Pbr-00159b | aattcaaaaaCACACAGTATTAGATGAGTTActcgagTAACTCATCTAATACTGTGTG   |
| CSNK1D  | ACGGACATTGCTGCAGGAGAA | Pbr-16375a | ccggACGGACATTGCTGCAGGAGAAactcgagTTCTCCTGCAGCAATGTCCGTttttg   |
| CSNK1D  |                       | Pbr-16375b | aattcaaaaaACGGACATTGCTGCAGGAGAAactcgagTTCTCCTGCAGCAATGTCCGT  |
| CSNK1D  | GACAGAAATACGAAAGGATTA | Pbr-16376a | ccggGACAGAAATACGAAAGGATTAactcgagTAATCCTTTCGTATTTCTGTCTttttg  |
| CSNK1D  |                       | Pbr-16376b | aattcaaaaaGACAGAAATACGAAAGGATTAactcgagTAATCCTTTCGTATTTCTGTCT |
| CSNK1D  | CGGCATGGAGAGAGAGCGGAA | Pbr-16377a | ccggCGGCATGGAGAGAGAGCGGAAactcgagTTCCGCTCTCTCCATGCCGttttg     |

|        |                        |            |                                                             |
|--------|------------------------|------------|-------------------------------------------------------------|
| CSNK1D |                        | Pbr-16377b | aattcaaaaaCGGCATGGAGAGAGAGCGGAActcgagTTCCGCTCTCTCTCCATGCCG  |
| ERCC8  | ACTAGAGGACCCAAAGTACAA  | Pbr-13855a | ccggACTAGAGGACCCAAAGTACAActcgagTTGTACTTTGGGTCCTCTAGTtttttg  |
| ERCC8  |                        | Pbr-13855b | aattcaaaaaACTAGAGGACCCAAAGTACAActcgagTTGTACTTTGGGTCCTCTAGT  |
| ERCC8  | GTATGGGATACAAATACATTA  | Pbr-13856a | ccggGTATGGGATACAAATACATTActcgagTAATGTATTTGTATCCCATACtttttg  |
| ERCC8  |                        | Pbr-13856b | aattcaaaaaGTATGGGATACAAATACATTActcgagTAATGTATTTGTATCCCATAC  |
| ERCC8  | AGTCTGGATCCTGTTCTCACA  | Pbr-13857a | ccggAGTCTGGATCCTGTTCTCACActcgagTGTGAGAACAGGATCCAGACTtttttg  |
| ERCC8  |                        | Pbr-13857b | aattcaaaaaAGTCTGGATCCTGTTCTCACActcgagTGTGAGAACAGGATCCAGACT  |
| EZR    | GGCCAAAGAAGCCCAGGATGA  | Pbr-12106a | ccggGGCCAAAGAAGCCCAGGATGActcgagTCATCCTGGGCTTCTTTGGCCtttttg  |
| EZR    |                        | Pbr-12106b | aattcaaaaaGGCCAAAGAAGCCCAGGATGActcgagTCATCCTGGGCTTCTTTGGCC  |
| EZR    | GAGAGAAACCGTGGAGAGAGA  | Pbr-12107a | ccggGAGAGAAACCGTGGAGAGAGActcgagTCTCTCTCCACGGTTTCTCTCtttttg  |
| EZR    |                        | Pbr-12107b | aattcaaaaaGAGAGAAACCGTGGAGAGAGActcgagTCTCTCTCCACGGTTTCTCTC  |
| EZR    | CGTGTACGAGCCGGTGAGCTA  | Pbr-12108a | ccggCGTGTACGAGCCGGTGAGCTActcgagTAGCTCACCGGCTCGTACACGtttttg  |
| EZR    |                        | Pbr-12108b | aattcaaaaaCGTGTACGAGCCGGTGAGCTActcgagTAGCTCACCGGCTCGTACACG  |
| HADHA  | ATGCTGACTGGTAGAAGCATT  | Pbr-17306a | ccggATGCTGACTGGTAGAAGCATTctcgagAATGCTTCTACCAGTCAGCATtttttg  |
| HADHA  |                        | Pbr-17306b | aattcaaaaaATGCTGACTGGTAGAAGCATTctcgagAATGCTTCTACCAGTCAGCAT  |
| HADHA  | TGCCAAAGGACTAGCTGATAA  | Pbr-17307a | ccggTGCCAAAGGACTAGCTGATAActcgagTTATCAGCTAGTCCTTTGGCAtttttg  |
| HADHA  |                        | Pbr-17307b | aattcaaaaaTGCCAAAGGACTAGCTGATAActcgagTTATCAGCTAGTCCTTTGGCA  |
| HADHA  | GAGGTTGCCATTTTCATGCCAA | Pbr-17308a | ccggGAGGTTGCCATTTTCATGCCAActcgagTTGGCATGAAATGGCAACCTCtttttg |
| HADHA  |                        | Pbr-17308b | aattcaaaaaGAGGTTGCCATTTTCATGCCAActcgagTTGGCATGAAATGGCAACCTC |

|          |                       |            |                                                             |
|----------|-----------------------|------------|-------------------------------------------------------------|
| SDHC     | TTCTTACTGTGTTGTCCTCTA | Pbr-11628a | ccggTTCTTACTGTGTTGTCCTCTActcgagTAGAGGACAACACAGTAAGAAtttttg  |
| SDHC     |                       | Pbr-11628b | aattcaaaaaTTCTTACTGTGTTGTCCTCTActcgagTAGAGGACAACACAGTAAGAA  |
| SDHC     | TTGGTCTCTTCCCATGGCGAT | Pbr-11629a | ccggTTGGTCTCTTCCCATGGCGATctcgagATCGCCATGGGAAGAGACCAAtttttg  |
| SDHC     |                       | Pbr-11629b | aattcaaaaaTTGGTCTCTTCCCATGGCGATctcgagATCGCCATGGGAAGAGACCAA  |
| SDHC     | CCTGAAGATTCCCCAGCTATA | Pbr-11630a | ccggCCTGAAGATTCCCCAGCTATAActcgagTATAGCTGGGGAATCTTCAGGtttttg |
| SDHC     |                       | Pbr-11630b | aattcaaaaaCCTGAAGATTCCCCAGCTATAActcgagTATAGCTGGGGAATCTTCAGG |
| SPRTN    | AATCAAGGAACCAGAGAATTA | Pbr-13786a | ccggAATCAAGGAACCAGAGAATTAActcgagTAATTCTCTGGTTCCTTGATTtttttg |
| SPRTN    |                       | Pbr-13786b | aattcaaaaaAATCAAGGAACCAGAGAATTAActcgagTAATTCTCTGGTTCCTTGATT |
| SPRTN    | CCAGTATTGGCCGCAGAGAAT | Pbr-13787a | ccggCCAGTATTGGCCGCAGAGAATctcgagATTCTCTGCGGCAATACTGGtttttg   |
| SPRTN    |                       | Pbr-13787b | aattcaaaaaCCAGTATTGGCCGCAGAGAATctcgagATTCTCTGCGGCAATACTGG   |
| SPRTN    | CCGTATTACGGCTATGTCAAA | Pbr-13788a | ccggCCGTATTACGGCTATGTCAAAActcgagTTTGACATAGCCGTAATACGGtttttg |
| SPRTN    |                       | Pbr-13788b | aattcaaaaaCCGTATTACGGCTATGTCAAAActcgagTTTGACATAGCCGTAATACGG |
| TRPS1    | ATGCTGCAGAACTAAATCATA | Pbr-11698a | ccggATGCTGCAGAACTAAATCATAActcgagTATGATTTAGTTCTGCAGCATtttttg |
| TRPS1    |                       | Pbr-11698b | aattcaaaaaATGCTGCAGAACTAAATCATAActcgagTATGATTTAGTTCTGCAGCAT |
| TRPS1    | CACCAAGTATTTCCGCTGTAA | Pbr-11699a | ccggCACCAAGTATTTCCGCTGTAAActcgagTTACAGCGGAAATACTTGGTGtttttg |
| TRPS1    |                       | Pbr-11699b | aattcaaaaaCACCAAGTATTTCCGCTGTAAActcgagTTACAGCGGAAATACTTGGTG |
| TRPS1    | GTGCCAATTGCCTGACCACAA | Pbr-11700a | ccggGTGCCAATTGCCTGACCACAAActcgagTTGTGGTCAGGCAATTGGCACtttttg |
| TRPS1    |                       | Pbr-11700b | aattcaaaaaGTGCCAATTGCCTGACCACAAActcgagTTGTGGTCAGGCAATTGGCAC |
| ZMPSTE24 | GAGGGAAAGCTTAAAGAAGAA | Pbr-16714a | ccggGAGGGAAAGCTTAAAGAAGAAActcgagTTCTTCTTAAAGCTTTCCCTCtttttg |

|          |                       |            |                                                             |
|----------|-----------------------|------------|-------------------------------------------------------------|
| ZMPSTE24 |                       | Pbr-16714b | aattcaaaaaGAGGGAAAGCTTAAAGAAGAAActcgagTTCTTCTTTAAGCTTTCCCTC |
| ZMPSTE24 | AGCGGCAGAGAAGGATATATA | Pbr-16715a | ccggAGCGGCAGAGAAGGATATATAActcgagTATATATCCTTCTCTGCCGCTttttg  |
| ZMPSTE24 |                       | Pbr-16715b | aattcaaaaaAGCGGCAGAGAAGGATATATAActcgagTATATATCCTTCTCTGCCGCT |
| ZMPSTE24 | TAACAAAGATAACTTGGGATT | Pbr-16716a | ccggTAACAAAGATAACTTGGGATTctcgagAATCCCAAGTTATCTTTGTTAttttg   |
| ZMPSTE24 |                       | Pbr-16716b | aattcaaaaaTAACAAAGATAACTTGGGATTctcgagAATCCCAAGTTATCTTTGTTA  |
| RRM2     | CGGAGGAGAGAGTAAGAGAAA | Pbr48744a  | CcggCGGAGGAGAGAGTAAGAGAAAActcgagTTTCTCTTACTCTCTCCTCCGttttg  |
| RRM2     |                       | Pbr48744b  | aattcaaaaaCGGAGGAGAGAGTAAGAGAAAActcgagTTTCTCTTACTCTCTCCTCCG |
| RRM2     | GCTCAAGAAACGAGGACTGAT | Pbr48745a  | CcggGCTCAAGAAACGAGGACTGATctcgagATCAGTCCTCGTTTCTTGAGCttttg   |
| RRM2     |                       | Pbr48745b  | aattcaaaaaGCTCAAGAAACGAGGACTGATctcgagATCAGTCCTCGTTTCTTGAGC  |
| RRM2     | GCAGATGTATAAGAAGGCAGA | Pbr48746a  | CcggGCAGATGTATAAGAAGGCAGActcgagTCTGCCTTCTTATACATCTGCttttg   |
| RRM2     |                       | Pbr48746b  | aattcaaaaaGCAGATGTATAAGAAGGCAGActcgagTCTGCCTTCTTATACATCTGC  |

Table S2. Antibodies used in Western blot analysis.

| Primary antibodyies      | Dilution | Company    |
|--------------------------|----------|------------|
| CDKL3                    | 1:1000   | Bioss      |
| GAPDH                    | 1:3000   | Bioworld   |
| N-cadherin               | 1:5000   | Abcam      |
| Vimentin                 | 1:1000   | Abcam      |
| Snail                    | 1:1000   | Abcam      |
| ERK                      | 1:1000   | Abcam      |
| p-ERK                    | 1:1000   | Abcam      |
| JNK                      | 1:1000   | Abcam      |
| p-JNK                    | 1:1000   | Abcam      |
| P38                      | 1:1000   | Abcam      |
| p-P38                    | 1:1000   | Abcam      |
| MEK                      | 1:3000   | CST        |
| p-MEK                    | 1:500    | Bioss      |
| EGFR                     | 1:1000   | Abcam      |
| RRM2                     | 1:1000   | Abcam      |
| PPM1A                    | 1:1000   | Abcam      |
| CD133                    | 1:1000   | abcam      |
| MELK                     | 1:1000   | abcam      |
| SOX2                     | 1:1000   | abcam      |
| TLR4                     | 1:1000   | SANTA CRUZ |
| NF- $\kappa$ B           | 1:1000   | CST        |
| c-Myc                    | 1:1000   | CST        |
| Secondary antibody       |          |            |
| HRP Goat Anti-Rabbit IgG | 1:3000   | Beyotime   |
| HRP Goat Anti-Mouse IgG  | 1:3000   | Beyotime   |

Table S3. Clinicopathological characteristics of 149 glioblastoma patients recruited in the detection of RRM2.

| Characteristics  | Patients (n = 149) | RRM2 Expression |      |
|------------------|--------------------|-----------------|------|
|                  |                    | Low             | High |
| Gender           |                    |                 |      |
| Male             | 96 (64.4%)         | 46              | 50   |
| Female           | 53 (35.6%)         | 28              | 25   |
| Tumor recurrence |                    |                 |      |
| No               | 68 (45.6%)         | 55              | 13   |
| Yes              | 81 (54.4%)         | 19              | 62   |
| Grade            |                    |                 |      |
| I                | 17 (11.4%)         | 15              | 2    |
| II               | 70 (47.0%)         | 51              | 19   |
| III              | 44 (29.5%)         | 8               | 36   |
| IV               | 18 (12.1%)         | 0               | 18   |
